# Insulin Resistance and the Cluster of Abnormalities Related to the Metabolic Syndrome Are Associated With Reduced Glomerular Filtration Rate in Patients With Type 2 Diabetes

SALVATORE DE COSMO, MD<sup>1</sup>  
ROBERTO TREVISAN, MD<sup>2</sup>  
ANTONIO MINENNA, MD<sup>1</sup>  
MONICA VEDOVATO, MD<sup>3</sup>  
RAFFAELLA VITI, MD<sup>1</sup>

STEFANO A. SANTINI, MD<sup>4</sup>  
ALESSANDRO R. DODESINI, MD<sup>2</sup>  
PAOLA FIORETTO, MD<sup>5</sup>  
VINCENZO TRISCHITTA, MD<sup>1,6</sup>

**B**ecause of its devastating outcomes, including end-stage renal disease and increased cardiovascular morbidity and mortality (1–3), chronic kidney disease (CKD) is a worldwide public health problem (4). Diabetes is the leading cause of end-stage renal disease in the Western world (5). Several evidences suggest that insulin resistance and the metabolic syndrome are associated with and probably contribute to reduced glomerular filtration rate (GFR) in patients with type 1 diabetes (6,7). At variance, no data are available in type 2 diabetes. The aim of this work was to investigate the role of insulin resistance and the cluster of metabolic syndrome–related (MS-r) abnormalities on kidney function in patients with type 2 diabetes.

## RESEARCH DESIGN AND METHODS

Two samples were studied. Selection criteria and clinical features of the first samples have been already published (8). Briefly, 731 type 2 diabetic patients (384 men and 347 women, age  $61.4 \pm 10$  years, diabetes duration  $10.8 \pm 9$  years, HbA<sub>1c</sub> [A1C]  $8.2 \pm$

1.5%) were consecutively recruited at the Casa Sollievo della Sofferenza Institute in San Giovanni Rotondo. Standardized serum creatinine was measured by the modified kinetic Jaffe reaction. Micro- or macroalbuminuria was diagnosed when albumin-to-creatinine ratio (ACR) was  $\geq 2.5$  mg/mmol in men and 3.5 mg/mmol in women; 216 patients (29%) had macroalbuminuria. Estimated GFR was calculated with the abbreviated MDRD (Modification of Diet inRenal Disease) formula (9). CKD was defined as estimated GFR  $< 60$  ml/min per  $1.73$  m<sup>2</sup>. The homeostasis model assessment of insulin resistance index was calculated as fasting serum insulin (mU/ml)  $\times$  fasting plasma glucose (mmol/l)/22.5 (10).

Besides diabetes, cardiovascular risk factors related to the metabolic syndrome such as arterial hypertension, dyslipidemia, and abdominal obesity were considered as reported (8). An individual MS-r score was then assigned ranging from 0 (diabetes only) to 3.

In an independent sample of 86 patients with type 2 diabetes (68 men and 18 women, age  $58.4 \pm 10$  years, diabetes

duration  $10.6 \pm 7$  years, A1C  $8.2 \pm 1.5\%$ ) recruited at the Ospedali Riuniti of Bergamo and at the University of Padova, insulin sensitivity (by euglycemic-hyperinsulinemic clamp) and GFR (by EDTA) were measured.

**RESULTS** — In the 731 type 2 diabetic patients of the first sample, estimated GFR was  $74.3 \pm 19$  ml/min per  $1.73$  m<sup>2</sup>. A significant association was observed between estimated GFR and sex (being lower in women,  $P < 0.001$ ), duration of diabetes ( $r = -0.3$ ,  $P < 0.001$ ), urinary ACR ( $r = -0.3$ ,  $P < 0.001$ ), retinopathy (being lower in patients with retinopathy,  $P = 0.005$ ), and smoking (being higher in smokers,  $P = 0.0001$ ) but not with A1C ( $r = 0.06$ ,  $P = 0.1$ ). When singly considered, arterial hypertension, dyslipidemia, and increased waist circumference (i.e., the three abnormalities related to the metabolic syndrome) were significantly associated with estimated GFR ( $P$  values ranging from 0.002 to 0.00002). MS-r score was 0 in 17 (2.3%), 1 in 86 (11.8%), 2 in 289 (39.5%), and 3 in 339 (46.4%) type 2 diabetic patients; estimated GFR progressively and significantly decreased with increasing MS-r score ( $82 \pm 19$ ,  $76 \pm 18$ , and  $71 \pm 18$  ml/min per  $1.73$  m<sup>2</sup> in patients with score of 0–1, 2, and 3, respectively;  $P < 0.001$  by ANOVA) (Fig. 1). The association between MS-r score and estimated GFR was still significant after adjusting for several confounders including sex ( $P = 0.001$ ), duration of diabetes ( $P < 0.001$ ), ACR ( $P < 0.0001$ ), retinopathy ( $P < 0.001$ ), and the four variables considered together ( $P = 0.001$ ). Age was not considered as a possible confounder for which to adjust because it is strongly correlated with duration of diabetes ( $r = 0.41$ ,  $P < 0.00001$ ) (i.e., collinearity), a finding that would have made it difficult to evaluate the independent effect of the two variables (11). The association between MS-r score and estimated GFR was also inde-

From the <sup>1</sup>Unit of Endocrinology, Scientific Institute Casa Sollievo della Sofferenza, San Giovanni Rotondo, Italy; the <sup>2</sup>Unit of Diabetes, Ospedali Riuniti di Bergamo, Bergamo, Italy; the <sup>3</sup>Chair of Metabolic Diseases, University of Padova, Padova, Italy; the <sup>4</sup>Unit of Clinical Chemistry, Scientific Institute Casa Sollievo della Sofferenza, San Giovanni Rotondo, Italy; the <sup>5</sup>Department of Medical and Surgical Sciences, University of Padova, Padova, Italy; and the <sup>6</sup>Department of Clinical Sciences, University La Sapienza, Rome, Italy.

Address correspondence and reprint requests to Dr. Salvatore De Cosmo, Endocrinologia, Scientific Institute Casa Sollievo della Sofferenza, V.le Cappuccini 1, 71013 San Giovanni Rotondo, Foggia, Italy. E-mail: sdecosm@tin.it and Dr. Vincenzo Trischitta, Istituto CSS-Mendel, V.le R. Margherita 261, 00198 Roma, Italy. E-mail: vincenzo.trischitta@uniroma1.it.

Received for publication 30 September 2005 and accepted in revised form 12 November 2005.

**Abbreviations:** ACR, albumin-to-creatinine ratio; CKD, chronic kidney disease; GFR, glomerular filtration rate; MS-r, metabolic syndrome–related.

A table elsewhere in this issue shows conventional and Système International (SI) units and conversion factors for many substances.

© 2006 by the American Diabetes Association.

The costs of publication of this article were defrayed in part by the payment of page charges. This article must therefore be hereby marked "advertisement" in accordance with 18 U.S.C. Section 1734 solely to indicate this fact.

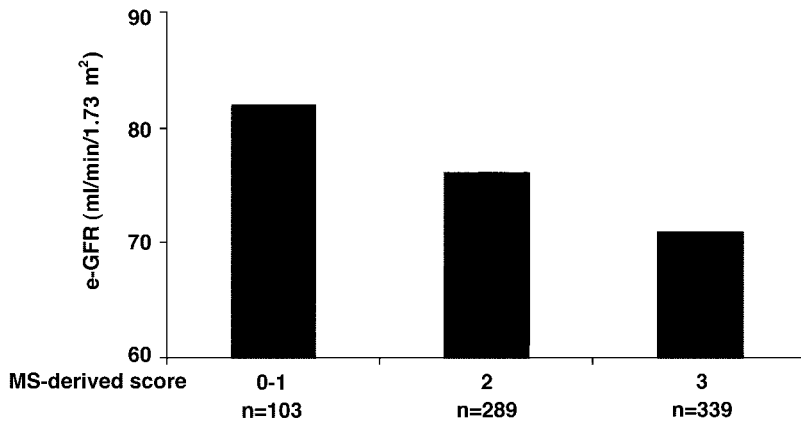

**Figure 1**—Estimated GFR values according to the MS-r score in 731 patients with type 2 diabetes.

pendent of other possible additional confounders, such as A1C ( $P < 0.0001$ ), smoking ( $P < 0.0001$ ), systolic ( $P < 0.0001$ ) and diastolic ( $P < 0.0001$ ) blood pressure, antidiabetic ( $P < 0.001$ ) and antihypertensive ( $P = 0.02$ ) therapy, and treatment with ACE inhibitors and/or angiotensin II receptor antagonist ( $P = 0.03$ ). The MS-r score was significantly associated with estimated GFR in patients without ( $n = 508$ ,  $P = 0.002$ ) or with ( $n = 223$ ,  $P < 0.001$ ) retinopathy. Of note, the association between estimated GFR and MS-r score was strengthened by the presence of retinopathy ( $P$  for interaction between metabolic syndrome and retinopathy = 0.005). As compared with a MS-r score of 0–1, both MS-r scores of 2 and 3 predicted the risk to be affected by CKD (odds ratio 3.4 [95% CI 1.3–9.2],  $P = 0.02$  and 4.6 [95% CI 1.6–12.4],  $P = 0.003$ , respectively, after adjusting for sex, duration of disease, ACR, and retinopathy).

A significant inverse correlation was observed between estimated GFR and the homeostasis model assessment of insulin resistance index, a surrogate of insulin resistance ( $r = -0.2$ ,  $P < 0.001$ ). In patients of the second sample, a significant correlation was observed between the glucose disposal rate value (at euglycemic clamp) and GFR (by EDTA) ( $r = 0.30$ ,  $P = 0.004$ ; age and sex adjusted).

**CONCLUSIONS**— In the present study we demonstrate that in patients with type 2 diabetes the cluster of abnormalities related to the metabolic syndrome is associated with reduced kidney function and increases the risk of being affected by CKD (i.e., a GFR  $< 60$  ml/min per  $1.73$  m<sup>2</sup>). This association is independent of sex, duration of diabetes, urinary

ACR, and retinopathy. A similar association has been recently reported in the general adult population (12) also including patients affected by type 2 diabetes. Whole-body insulin resistance on glucose handling is likely to underlie most, if not all, features of the metabolic syndrome (13), and this may explain the relationship between insulin sensitivity and kidney function we observed in this study. Since insulin resistance and all other features of the metabolic syndrome are established risk factors of cardiovascular disease, our data suggest that they could, in fact, represent the pathogenic link of the well-known association between advanced renal disease and cardiovascular mortality and morbidity observed in type 2 diabetic patients (14).

It is worth noting that although the association between the metabolic syndrome and kidney function was independent of retinopathy it was nonetheless significantly strengthened by the coexistence of it indicating that microangiopathy interacts with the metabolic syndrome in modulating kidney function in type 2 diabetic patients. These data are compatible with the observation that kidney disease in patients with type 2 diabetes is a quite heterogeneous disease modulated by both microangiopathy (and subsequent diabetic glomerulosclerosis) and atherosclerosis (15).

In conclusion, in patients with type 2 diabetes, insulin resistance, and the cluster of abnormalities related to the metabolic syndrome are strongly associated with kidney dysfunction. Although the study design (i.e., cross-sectional) does not allow us to draw firm conclusions about causality, the results obtained strongly suggest that insulin resistance and the metabolic syndrome affect GFR in

patients with type 2 diabetes. Future prospective studies are urgently needed to understand whether treatment of insulin resistance may positively influence the onset and/or progression of kidney dysfunction in patients with type 2 diabetes.

**Acknowledgments**— This study was supported by a grant of the Ministero della Salute.

We thank Professor Giancarlo Viberti (London, U.K.) for reading the manuscript and providing useful suggestions

## References

1. He J, Whelton PK: Epidemiology of end-stage renal disease. In *International Handbook of Hypertension*. Brenner BM, Kurokawa K, Eds. Haslemere, U.K., Eumed Communications, 1999
2. Muntner P, He J, Hamm L, Loria C, Whelton PK: Renal insufficiency and subsequent death resulting from cardiovascular disease in the United States. *J Am Soc Nephrol* 13:745–753, 2002
3. Foley RN, Parfrey PS, Sarnak MJ: Clinical epidemiology of cardiovascular disease in chronic renal disease. *Am J Kidney Dis* 2:S112–S119, 1998
4. Clase CM, Garg AX, Kiberd BA: Prevalence of low glomerular filtration rate in nondiabetic Americans: Third National Health and Nutrition Examination Survey (NHANES III). *J Am Soc Nephrol* 13:1338–1349, 2002
5. National Technical Information Service: *United States Renal Data System Annual Report*. Springfield, VA, U.S. Dept. of Health and Human Services, 1999
6. Chaturvedi N, Bandinelli S, Mangili R, Penno G, Rottiers RE, Fuller JH: Microalbuminuria in type 1 diabetes: rates, risk factors and glycemic threshold. *Kidney Int* 60:219–227, 2001
7. Yip J, Mattock MB, Morocutti A, Sethi M, Trevisan R, Viberti GC: Insulin resistance in insulin-dependent diabetic patients with microalbuminuria. *Lancet* 342:883–887, 1993
8. De Cosmo S, Minenna A, Ludovico O, Mastroianno S, Di Giorgio A, Pirro L, Trischitta V: Increased urinary albumin excretion, insulin resistance, and related cardiovascular risk factors in patients with type 2 diabetes: evidence of a sex-specific association. *Diabetes Care* 28:910–915, 2005
9. Levey AS, Greene T, Kusek JW, Beck GJ: A simplified equation to predict glomerular filtration rate from serum creatinine (Abstract). *J Am Soc Nephrol* 11:155A, 2000
10. Matthews DR, Hosker JP, Rudenski AS, Naylor BA, Treacher DF, Turner RC: Homeostasis model assessment: insulin resistance and beta-cell function from

## Insulin resistance and kidney function

- fasting plasma glucose and insulin concentrations in man. *Diabetologia* 28:412–419, 1985
11. Clayton D, Hills M: *Statistical Models in Epidemiology*. Oxford, U.K., Oxford Science Publication, 2001, p. 247
  12. Chen J, Muntner P, Hamm LL, Jones DW, Batuman V, Fonseca V, Whelton PK, He J: The metabolic syndrome and chronic kidney disease in U.S. adults. *Ann Intern Med* 140:167–174, 2004
  13. Reaven GM: Role of insulin resistance in human disease. *Diabetes* 37:1595–1607, 1988
  14. Roper NA, Bilous RW, Kelly WF, Unwin NC Connolly VM: Cause-specific mortality in a population with diabetes: South Tees Diabetes Mortality Study. *Diabetes Care* 25:43–48, 2002
  15. MacIsaac RJ, Tsalamandris C, Panagiotopoulos S, Smith TJ, McNeill KJ, Jerums G: Nonalbuminuric renal insufficiency in type 2 diabetes. *Diabetes Care* 27:195–200, 2004
